# Supplementary material for: Ischemic stroke causes Parkinson’s disease-like pathology and symptoms in transgenic mice overexpressing alpha-synuclein
Source: PubMed Central journal article supplement (PMC8867857; doi:10.1186/s40478-022-01327-6), 2022-02-24
Supplement: 40478_2022_1327_MOESM1_ESM.pdf [file 40478_2022_1327_MOESM1_ESM.pdf]

**Table S1** Antibodies used for immunofluorescence and immunohistochemistry

| Target (alternative name) [antibody clone]                  | Source           | Catalogue number | Host       | Dilutions for IF | Dilutions for IHC | Buffers for antigen retrieval |
|-------------------------------------------------------------|------------------|------------------|------------|------------------|-------------------|-------------------------------|
| alpha-Synuclein (phospho S129) [81A]                        | Covance          | MMS-5091         | Mouse      | –                | 1:200             | Citrate buffer                |
| alpha-Synuclein (phospho S129) [EP1536Y]                    | Abcam            | AB51253          | Rabbit     | –                | 1:500,000         | –                             |
| alpha-Synuclein (phospho S129) [pSyn#64]                    | Wako             | 015-25191        | Mouse      | 1:1200           | –                 | Citrate buffer                |
| alpha-Synuclein (phospho S129) [pSyn#64], biotin-conjugated | Wako             | 010-26481        | Mouse      | –                | 1:1000            | Formic acid                   |
| Glial fibrillary acidic protein (GFAP)                      | Dako             | Z0334            | Rabbit     | –                | 1:500             | Formic acid                   |
| Glial fibrillary acidic protein (GFAP)                      | Invitrogen       | 13-0300          | Rat        | 1:150            | –                 | Citrate buffer                |
| Ionized calcium binding adaptor molecule 1 (Iba1)           | Wako             | 019-19741        | Rabbit     | –                | 1:500             | Formic acid                   |
| Ionized calcium binding adaptor molecule 1 (Iba1)           | Synaptic Systems | 234004           | Guinea pig | 1:400            | –                 | Citrate buffer                |
| Neuronal nuclei (NeuN) [A60]                                | Merck Millipore  | MAB377           | Mouse      | –                | 1:1000            | Citrate buffer                |

|                                                |           |         |        |        |        |                |
|------------------------------------------------|-----------|---------|--------|--------|--------|----------------|
| Neuronal nuclei (NeuN) [clone 27-4]            | Merck     | MABN140 | Rabbit | 1:1000 | –      | Citrate buffer |
|                                                | Millipore |         |        |        |        |                |
| Oligodendrocyte transcription factor 2 (Olig2) | Merck     | AB9610  | Rabbit | 1:500  | –      | Citrate buffer |
|                                                | Millipore |         |        |        |        |                |
| Tyrosine hydroxylase (TH)                      | Merck     | ab152   | Rabbit | –      | 1:1000 | Citrate buffer |
|                                                | Millipore |         |        |        |        |                |

---

IF, immunofluorescence staining; IHC, immunohistochemistry
