# Supplementary material for: Ischemic stroke causes Parkinson’s disease-like pathology and symptoms in transgenic mice overexpressing alpha-synuclein
Source: PubMed Central journal article supplement (PMC8867857; doi:10.1186/s40478-022-01327-6), 2022-02-24

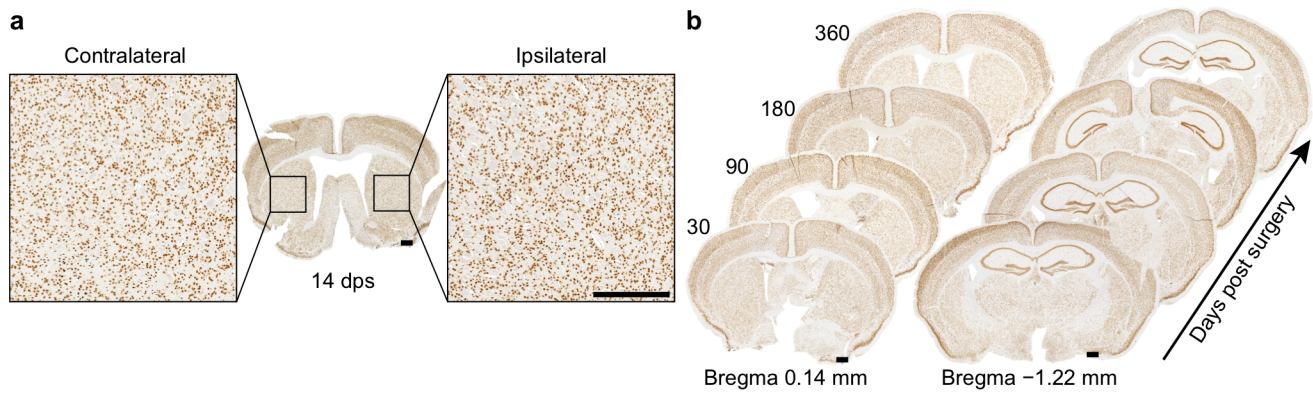

Supplement: 40478_2022_1327_MOESM2_ESM.pdf [file 40478_2022_1327_MOESM2_ESM.pdf]
